# Supplementary material for: Autohydrolysis and aqueous ammonia extraction of wheat straw: effect of treatment severity on yield and structure of hemicellulose and lignin
Source: Royal Society of Chemistry journal article supplement (doi:10.1039/c4ra03236e), 2014-01-01
Supplement: c4ra03236e1.pdf [file c4ra03236e1.pdf]

**Electronic Supplementary Information to the manuscript "Autohydrolysis and aqueous ammonia extraction of wheat straw: effect of treatment severity on yield and structure of hemicellulose and lignin".**

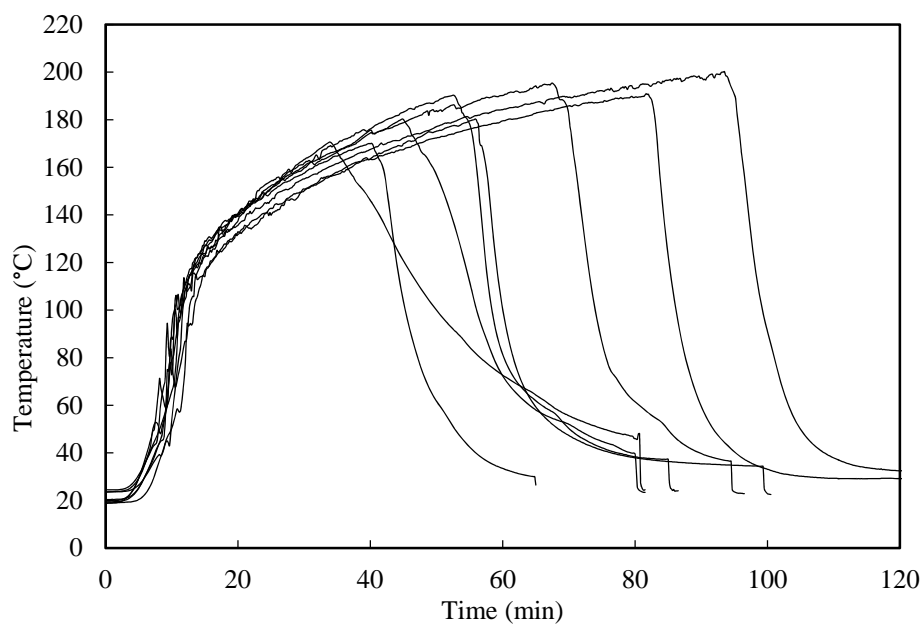

**Figure S1.** Temperature profiles of the eight autohydrolysis treatments carried out in a stirred batch autoclave with predetermined target temperatures from 170 °C to 200 °C.

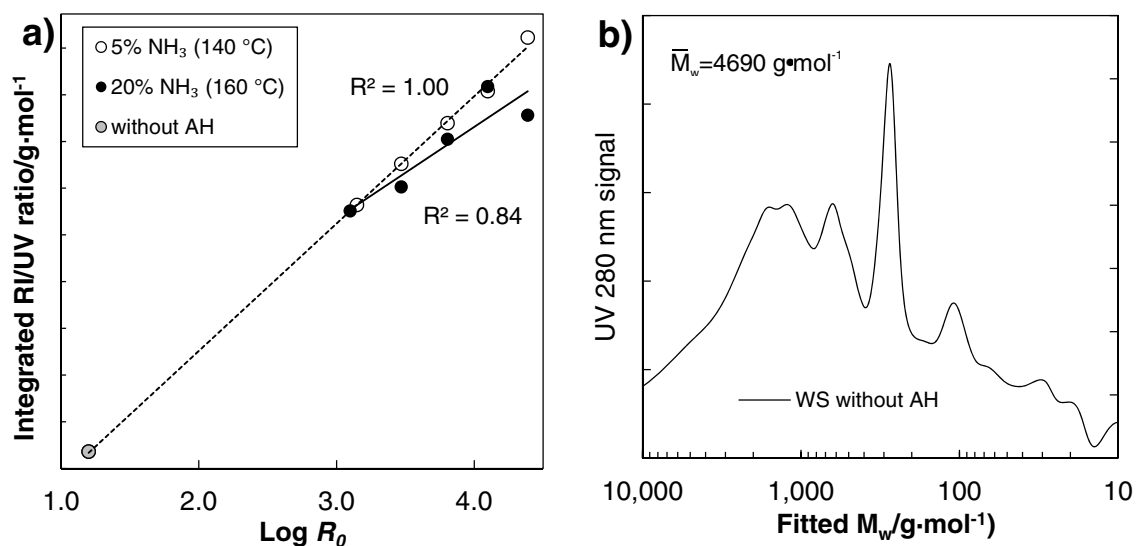

**Fig. S2.** High-performance size-exclusion chromatography (HPSEC) of aqueous ammonia extract from wheat straw without autohydrolysis: (a) ratio of RI to UV signals as a function of Log  $R_0$  (gray marker, severity calculated from 30 min treatment in boiling water). (b) UV 280 nm trace of HPSEC as a function of weight average molar mass.

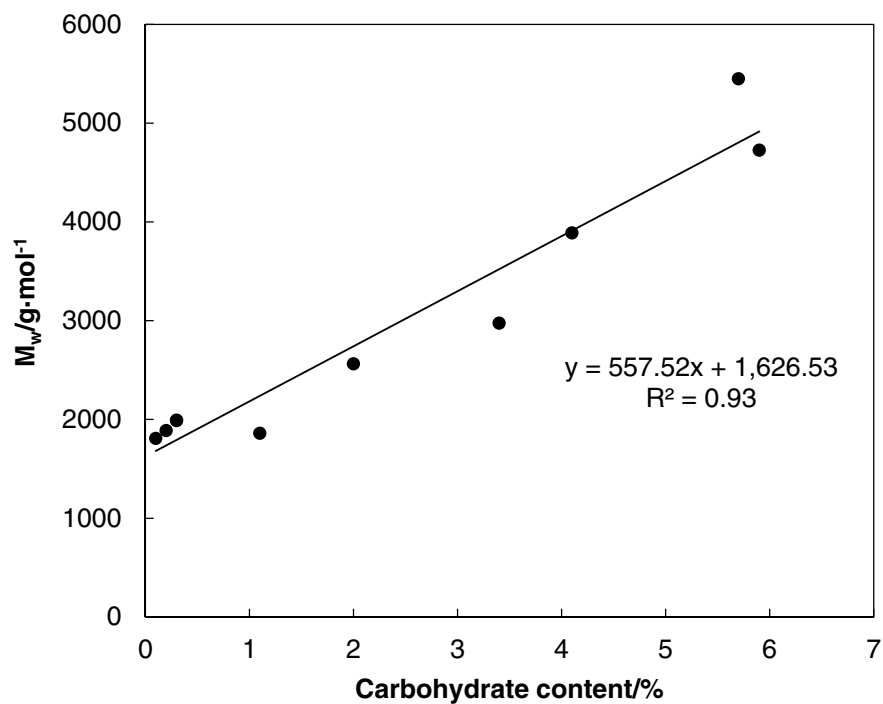

**Figure S3.** Weight average molar mass ( $M_w$ ) of the aqueous ammonia extracts obtained from extraction of autohydrolysis solid residues at moderate (5% 140 °C) or high (20% 160 °C) intensity conditions.

**Table S1.** Phenolic compounds in autohydrolysis liquors from wheat straw autohydrolysis at different severities (Log  $R_0$ ). The concentration of total phenolics was determined according to the Folin-Ciocalteu method using gallic acid standards, and phenolic monomers by reverse-phase HPLC.

| Log $R_0$ | Total FC-phenolics (GAE) ( $\mu\text{g/ml}$ ) | HPLC phenolic compounds ( $\mu\text{g/ml}$ ) |      |      |      |      |      |      |       | FA+CA of total phenolics (GAE) (%) | Total phenolic monomers of total FC-phenolics (%) |
|-----------|-----------------------------------------------|----------------------------------------------|------|------|------|------|------|------|-------|------------------------------------|---------------------------------------------------|
|           |                                               | H                                            | V    | S    | CA   | AV   | AS   | FA   | Total |                                    |                                                   |
| 3.10      | 530                                           | ND                                           | 7.0  | ND   | 11.9 | ND   | ND   | ND   | 18.9  | 2.2                                | 3.6                                               |
| 3.47      | 1000                                          | ND                                           | 14.7 | 21.8 | 22.6 | ND   | ND   | 18.3 | 77.4  | 3.7                                | 7.7                                               |
| 3.81      | 1460                                          | 4.3                                          | 29.5 | 27.3 | 42.5 | 15.4 | 13.4 | 43.0 | 175.3 | 5.8                                | 12.0                                              |
| 4.10      | 2110                                          | 4.1                                          | 29.3 | 21.2 | 34.6 | 18.5 | 11.1 | 31.9 | 150.7 | 3.2                                | 7.1                                               |
| 4.39      | 2170                                          | 5.5                                          | 44.0 | 25.1 | 16.3 | ND   | 16.7 | 31.8 | 139.4 | 1.5                                | 6.4                                               |
| 3.15      | 500                                           | ND                                           | 8.5  | 2.3  | 16.9 | ND   | ND   | 8.6  | 36.3  | 5.2                                | 7.3                                               |
| 3.52      | 1750                                          | ND                                           | 14.6 | 22.4 | 21.8 | ND   | ND   | 16.8 | 75.6  | 2.1                                | 4.3                                               |
| 4.06      | 1960                                          | 4.2                                          | 27.2 | 13.6 | 26.8 | ND   | 10.2 | 31.4 | 113.4 | 2.7                                | 5.8                                               |
